# Supplementary material for: Combination between metal–ligand coordination and hydrogen bond interaction: a facile route for the construction of 3D coordination networks with the ability to include relatively large aromatic molecules
Source: Royal Society of Chemistry journal article supplement (doi:10.1039/b911849g), 2009-01-01
Supplement: b911849g.pdf [file b911849g.pdf]

# Electronic Supplementary Information

## **Combination between metal-ligand coordination and hydrogen bond interaction: a facile route for the construction of 3D coordination networks with inclusion ability to relatively large aromatic molecules**

*Ryo Sekiya,\*<sup>a</sup> Shin-ichi Nishikiori<sup>b</sup> and Reiko Kuroda<sup>a,c</sup>*

*Department of Life Science, Graduate School of Arts and Sciences, The University of Tokyo, 3-8-1 Komaba, Meguro-ku, Tokyo 153-8902, Department of Basic Science, Graduate School of Arts and Sciences, The University of Tokyo, 3-8-1 Komaba, Meguro-ku, Tokyo 153-8902, Japan, and Japan Science and Technology Agency, ERATO, Kuroda Chiromorphology Project, 4-7-6 Komaba, Meguro-ku, Tokyo 153-0041, Japan*

csekiya@mail.ecc.u-tokyo.ac.jp

# Contents

## Experimental Section

- Materials and instrumentations ... S3

## Supporting Figures and Tables

- **Fig. S1**; Observed and simulated powder X-ray diffraction patterns of **1** ... S4
- **Fig. S2**; Observed and simulated powder X-ray diffraction patterns of **2** ... S4
- **Fig. S3**; Coordination environment around the Ni<sup>2+</sup> ion of **1** ... S5
- **Table S1**; Selected bond lengths and angles around the Ni<sup>2+</sup> ion of **1** ... S5
- **Fig. S4**;  $\pi \cdots \pi$  interaction between the guest and the isoNH<sub>2</sub> ligand found in **1** and **2** ... S6
- **Fig. S5**; Coordination environment around the Ni<sup>2+</sup> ion of **2** ... S7
- **Table S2**; Selected bond lengths and angles around the Ni<sup>2+</sup> ion of **2** ... S7
- **Table S3**; Crystallographic data of **1** and **2** ... S8

## References

- References ... S9

## Material and instrumentations

All chemicals and solvents were purchased from Kanto Chemical Co., Ltd., Wako Pure Chemical Co., Ltd., and Tokyo Kasei Kogyo Co., Ltd., and were used as received without further purification. Powder X-ray diffraction patterns were measured on a Rigaku Multi-Flex X-ray diffractometer using graphite-monochromatized Cu K $\alpha$  radiation ( $\lambda = 1.5418 \text{ \AA}$ ) with a scanning rate of  $0.020^\circ \text{ sec}^{-1}$  at room temperature. TG/DTA analysis was measured on a SEIKO instrument Inc. EXSTAR 6000 TG/DTA 6200. X-ray crystallographic data for **1** and **2** were collected on a Rigaku RAXIS-RAPID imaging plate area detector using graphite-monochromatized Mo K $\alpha$  radiation ( $\lambda = 0.71073 \text{ \AA}$ ) at 153 K. The crystal structures were solved by direct method using the *SHELXS-97* program<sup>1</sup> attached to *WinGX* ver. 1.64.00<sup>2</sup> and refined by the successive differential Fourier syntheses and full-matrix least-squares procedure using the *SHELXL-97* program<sup>1</sup> attached to *WinGX* ver. 1.64.00. Anisotropic thermal factors were applied to all non-hydrogen atoms. All hydrogen atoms were generated geometrically. Computer graphics of the crystal structures of **1** and **2** (Fig. 2, 5, S3 and S5) were portrayed with *ORTEP-3* for Windows ver. 2.00 program.<sup>3</sup> Computer graphics of the crystal structures of **1** and **2** (Fig. 3, 4, and S4) were portrayed with *Mercury* 1.4.2 program.<sup>4</sup> Simulation of the XRPD patterns of **1** and **2** were carried out by *Mercury* 1.4.2 program.

## Supporting Figures and Tables

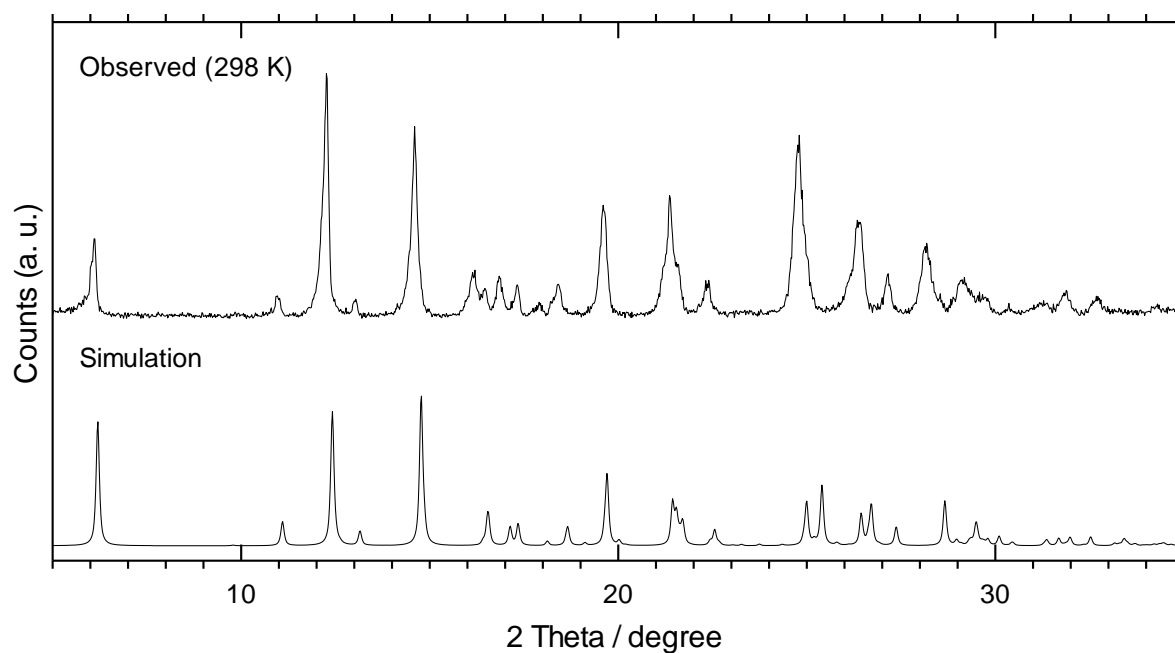

**Fig. S1.** Observed (top) and calculated (bottom) X-ray powder diffraction patterns of **1** ( $2\theta$  range:  $5^\circ < 2\theta < 35^\circ$ ).

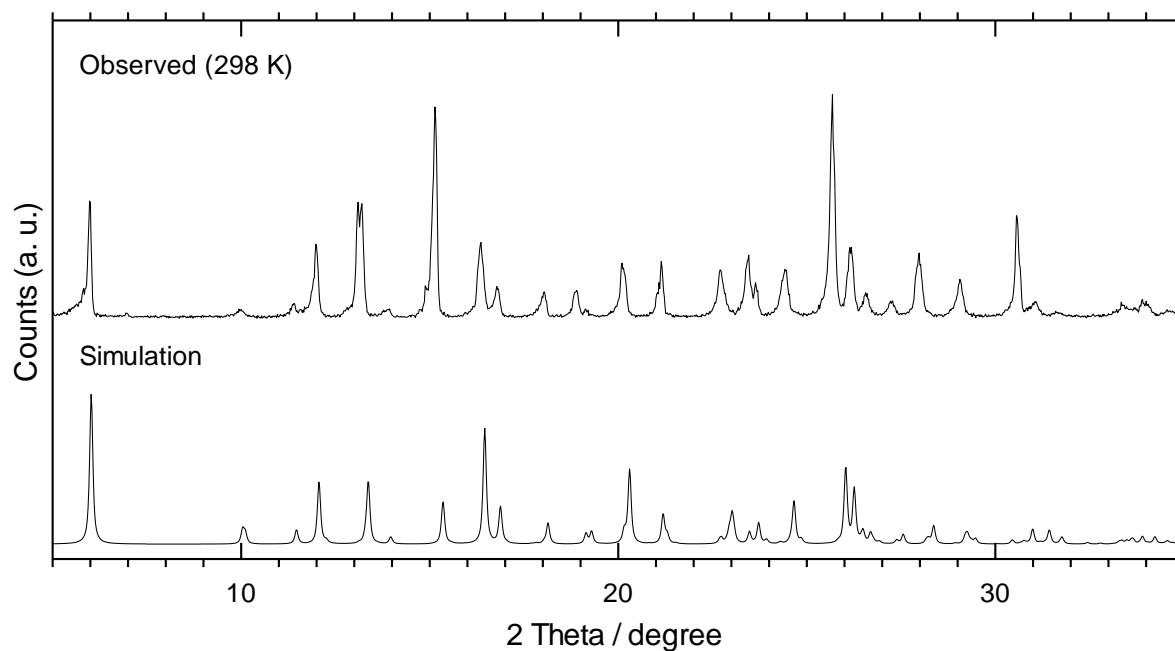

**Fig. S2.** Observed (top) and calculated (bottom) X-ray powder diffraction patterns of **2** ( $2\theta$  range:  $5^\circ < 2\theta < 35^\circ$ ).

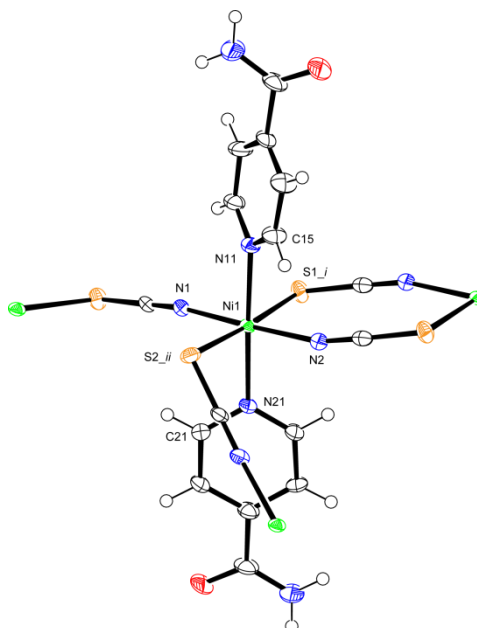

**Fig. S3.** ORTEP drawing (50 % probability ellipsoids) of the coordination environment around the Ni<sup>2+</sup> ion of **1**. Colour scheme: black (carbon or hydrogen), blue (nitrogen), red (oxygen), orange (sulfur), green (nickel). *\_i* and *\_ii* denote symmetry operations (*\_i*:  $-x + 3/2, -y + 3/2, -z + 1$ ; *\_ii*:  $-x + 3/2, y + 1/2, -z + 3/2$ ).

**Table S1.** Selected bond lengths, angles and torsion angle of **1**.<sup>a</sup>

|                                    | Bond length / Å | Bond angle / ° | Torsion angle / ° |
|------------------------------------|-----------------|----------------|-------------------|
| Ni1 – N1                           | 2.043(4)        |                |                   |
| Ni1 – N2                           | 2.040(4)        |                |                   |
| Ni1 – N11                          | 2.122(4)        |                |                   |
| Ni1 – N21                          | 2.098(4)        |                |                   |
| Ni1 – S1_ <i>i</i> <sup>b</sup>    | 2.561(1)        |                |                   |
| Ni1 – S2_ <i>ii</i> <sup>b</sup>   | 2.507(1)        |                |                   |
| N1 – Ni1 – N11                     |                 | 92.1(2)        |                   |
| N1 – Ni1 – N21                     |                 | 89.9(2)        |                   |
| N1 – Ni1 – N2                      |                 | 174.5(1)       |                   |
| N1 – Ni1 – S1_ <i>i</i>            |                 | 82.8(1)        |                   |
| N1 – Ni1 – S2_ <i>ii</i>           |                 | 93.0(1)        |                   |
| N11 – Ni1 – S1_ <i>i</i>           |                 | 88.8(1)        |                   |
| N11 – Ni1 – S2_ <i>ii</i>          |                 | 90.0(1)        |                   |
| N11 – Ni1 – N21                    |                 | 178.0(2)       |                   |
| S1_ <i>i</i> – Ni1 – S2_ <i>ii</i> |                 | 175.60(5)      |                   |
| C15 – N11 – N21 – C21              |                 |                | 60.7(4)           |

<sup>a</sup> All bond length, bond angle and torsion angle was calculated with *SHELXL-97* program.<sup>1</sup>

<sup>b</sup> Symmetry operations (*\_i*:  $-x + 3/2, -y + 3/2, -z + 1$ ; *\_ii*:  $-x + 3/2, y + 1/2, -z + 3/2$ ).

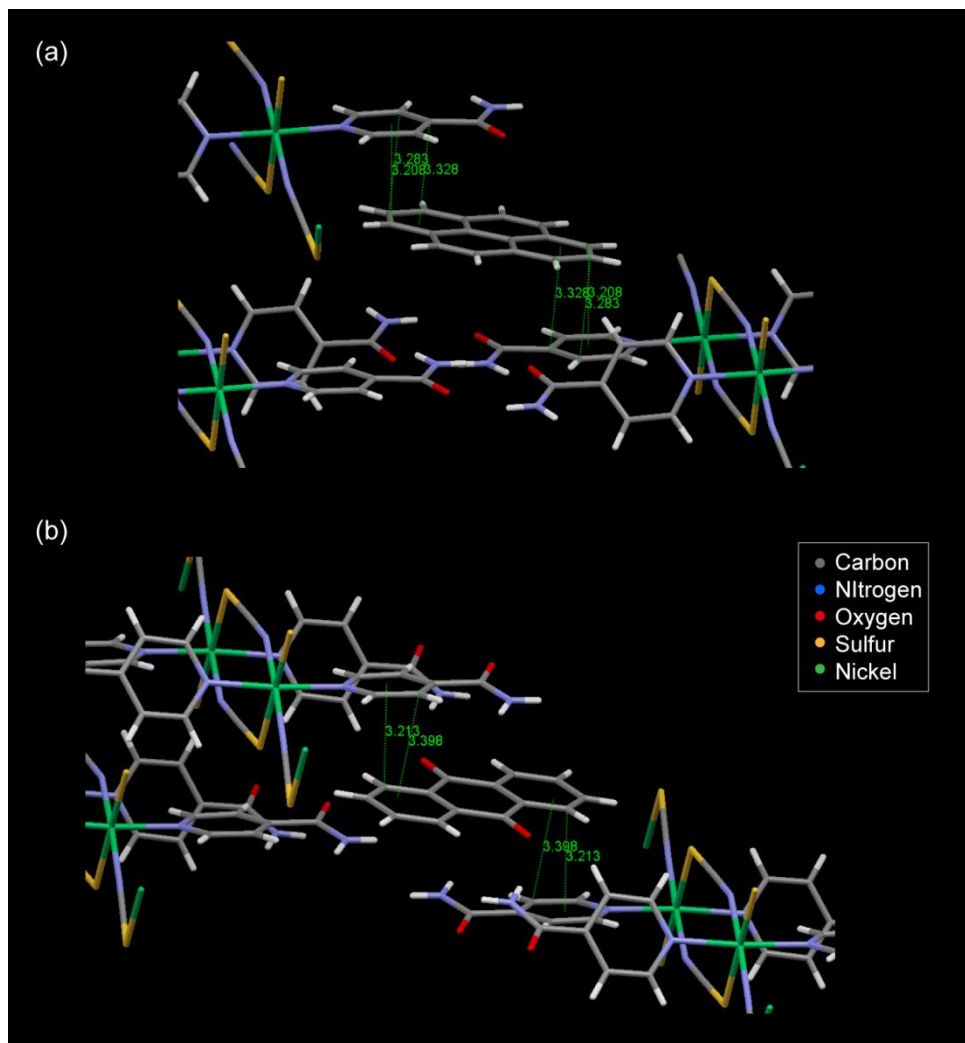

**Fig. S4.**  $\pi \cdots \pi$  interaction (a) between the PY guest and the isoNH<sub>2</sub> dimers found in **1** and (b) between the AQ guest and the isoNH<sub>2</sub> dimers found in **2**.

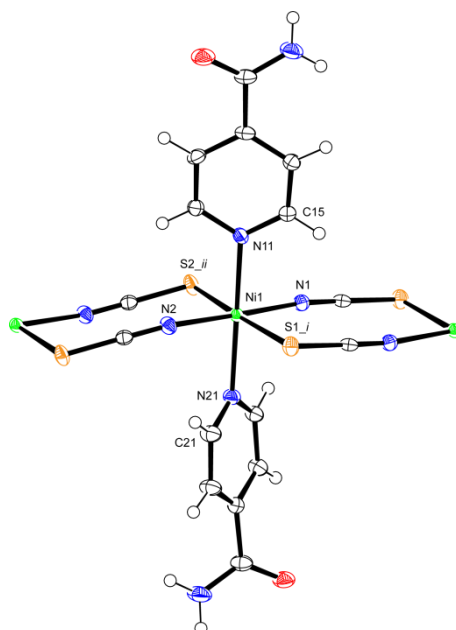

**Fig. S5.** ORTEP drawing (50 % probability ellipsoids) of the coordination environment around the Ni<sup>2+</sup> ion of **2**. Colour scheme: black (carbon or hydrogen), blue (nitrogen), red (oxygen), orange (sulfur), green (nickel). *\_i* and *\_ii* denote symmetry operations (*\_i*:  $-x, -y + 1, -z$ ; *\_ii*:  $-x, -y, -z$ ).

**Table S2.** Selected bond lengths, angles and torsion angle of **2**.<sup>a</sup>

|                                    | Bond length / Å | Bond angle / ° | Torsion angle / ° |
|------------------------------------|-----------------|----------------|-------------------|
| Ni1 – N1                           | 2.018(2)        |                |                   |
| Ni1 – N2                           | 2.008(2)        |                |                   |
| Ni1 – N11                          | 2.141(2)        |                |                   |
| Ni1 – N21                          | 2.120(2)        |                |                   |
| Ni1 – S1_ <i>i</i> <sup>b</sup>    | 2.5414(9)       |                |                   |
| Ni1 – S2_ <i>ii</i> <sup>b</sup>   | 2.5160(9)       |                |                   |
| N1 – Ni1 – N11                     |                 | 91.75(9)       |                   |
| N1 – Ni1 – N21                     |                 | 91.22(9)       |                   |
| N1 – Ni1 – N2                      |                 | 175.1(1)       |                   |
| N1 – Ni1 – S1_ <i>i</i>            |                 | 93.93(7)       |                   |
| N1 – Ni1 – S2_ <i>ii</i>           |                 | 80.48(7)       |                   |
| N11 – Ni1 – S1_ <i>i</i>           |                 | 87.15(7)       |                   |
| N11 – Ni1 – S2_ <i>ii</i>          |                 | 91.72(7)       |                   |
| N11 – Ni1 – N21                    |                 | 175.5(1)       |                   |
| S1_ <i>i</i> – Ni1 – S2_ <i>ii</i> |                 | 174.26(3)      |                   |
| C15 – N11 – N21 – C21              |                 |                | 66.1(3)           |

<sup>a</sup> All bond length, bond angle and torsion angle was calculated with *SHELXL-97* program.<sup>1</sup>

<sup>b</sup> Symmetry operations (*\_i*:  $-x, -y + 1, -z$ ; *\_ii*:  $-x, -y, -z$ ).

**Table S3.** Crystallographic parameters of **1** and **2**.

|                                                | <b>1</b>                                                                        | <b>2</b>                                                                        |
|------------------------------------------------|---------------------------------------------------------------------------------|---------------------------------------------------------------------------------|
| Formula                                        | C <sub>22</sub> H <sub>17</sub> N <sub>6</sub> O <sub>2</sub> S <sub>2</sub> Ni | C <sub>21</sub> H <sub>16</sub> N <sub>6</sub> O <sub>3</sub> S <sub>2</sub> Ni |
| Formula weight                                 | 520.25                                                                          | 523.22                                                                          |
| Crystal size /mm <sup>3</sup>                  | 0.10 × 0.10 × 0.10                                                              | 0.15 × 0.15 × 0.10                                                              |
| Crystal habit                                  | Block                                                                           | Block                                                                           |
| Crystal colour                                 | Bluish green                                                                    | Green                                                                           |
| Crystal system                                 | Monoclinic                                                                      | Triclinic                                                                       |
| Space group                                    | <i>C</i> 2/ <i>c</i> (#15)                                                      | <i>P</i> $\bar{1}$ (#2)                                                         |
| Temperature / <i>K</i>                         | 153                                                                             | 153                                                                             |
| <i>a</i> / Å                                   | 32.418(3)                                                                       | 7.9523(6)                                                                       |
| <i>b</i> / Å                                   | 9.5238(8)                                                                       | 10.9632(6)                                                                      |
| <i>c</i> / Å                                   | 15.937(2)                                                                       | 16.9567(10)                                                                     |
| $\alpha$ / °                                   | 90                                                                              | 90.564(4)                                                                       |
| $\beta$ / °                                    | 118.442(5)                                                                      | 65.422(3)                                                                       |
| $\gamma$ / °                                   | 90                                                                              | 56.997(9)                                                                       |
| <i>V</i> / Å <sup>3</sup>                      | 4326.6(7)                                                                       | 1071.9(1)                                                                       |
| <i>Z</i>                                       | 8                                                                               | 2                                                                               |
| $\mu$ (Mo K $\alpha$ ) / mm <sup>-1</sup>      | 1.124                                                                           | 1.138                                                                           |
| <i>D</i> <sub>calc.</sub> / g cm <sup>-3</sup> | 1.60                                                                            | 1.62                                                                            |
| <i>h</i> range                                 | 0 → 45                                                                          | 0 → 11                                                                          |
| <i>k</i> range                                 | 0 → 13                                                                          | -12 → 15                                                                        |
| <i>l</i> range                                 | -22 → 19                                                                        | -21 → 23                                                                        |
| No. of reflections measured                    | 24805                                                                           | 11387                                                                           |
| No. of reflections unique                      | 6259                                                                            | 5927                                                                            |
| No. of reflections observed                    | 2759                                                                            | 4173                                                                            |
| <i>R</i> <sub>int</sub>                        | 0.152                                                                           | 0.034                                                                           |
| No. of parameter used                          | 298                                                                             | 298                                                                             |
| <i>R</i> 1 ( <i>I</i> > 2σ( <i>I</i> ))        | 0.0592                                                                          | 0.0430                                                                          |
| <i>wR</i> 2                                    | 0.0997                                                                          | 0.1096                                                                          |
| <i>G. O. F.</i>                                | 0.846                                                                           | 1.046                                                                           |
| $\Delta\rho_{\text{max}}$ / e Å <sup>-3</sup>  | +0.666                                                                          | +0.964                                                                          |
| $\Delta\rho_{\text{min}}$ / e Å <sup>-3</sup>  | -0.827                                                                          | -0.875                                                                          |
| CCDC number                                    | 727046                                                                          | 727047                                                                          |

## References

1. G. M. Sheldrick, *Acta Cryst.*, **A64**, 112.
2. L. J. Farrugia, *J. Appl. Cryst.*, 1999, **32**, 837.
3. L. J. Farrugia, *J. Appl. Cryst.*, 1997, **30**, 565.
4. Mercury ver. 1.4.2 program. See: <http://www.ccdc.cam.ac.uk/products/mercury/>
